# Supplementary material for: Risen Alive: The Lazarus Phenomenon
Source: Hindawi journal article supplement (doi:10.1155/2022/3322056), 2022-02-15
Supplement: f1 [file 3322056.f1.pdf]

## Cardiopulmonary Resuscitation Report

|                                                                                                                                                        |                                    |                                                                                          |                                                                                |
|--------------------------------------------------------------------------------------------------------------------------------------------------------|------------------------------------|------------------------------------------------------------------------------------------|--------------------------------------------------------------------------------|
| Code <input checked="" type="checkbox"/> Blue <input type="checkbox"/> Pink                                                                            | Time Event Recognized: <u>2:15</u> | Location: _____                                                                          | Witnessed: <input checked="" type="checkbox"/> Yes <input type="checkbox"/> No |
|                                                                                                                                                        | Team Arrival Time: <u>2:16</u>     | Weight (Kg): _____                                                                       | Height (cm): _____                                                             |
| Hospital-wide resuscitation response activated? <input type="checkbox"/> Yes <input type="checkbox"/> No                                               |                                    | Was patient conscious at onset? <input type="checkbox"/> Yes <input type="checkbox"/> No |                                                                                |
| Condition when need for compressions/defibrillation was identified? <input type="checkbox"/> Pulseless <input type="checkbox"/> Pulse (poor perfusion) |                                    |                                                                                          |                                                                                |
| Did the patient with a pulse requiring compressions become pulseless? <input type="checkbox"/> Yes <input type="checkbox"/> No                         |                                    |                                                                                          |                                                                                |

### Airway/ Ventilation

| Breathing                                    | Ventilation                                           | Intubation        | Confirmation                                     |
|----------------------------------------------|-------------------------------------------------------|-------------------|--------------------------------------------------|
| <input type="checkbox"/> Spontaneous         | <input type="checkbox"/> Bag-Valve-Mask               | Time: <u>2:20</u> | <input type="checkbox"/> Auscultation            |
| <input type="checkbox"/> Apneic              | <input checked="" type="checkbox"/> Endotracheal Tube | Size: _____       | <input type="checkbox"/> Exhaled CO <sub>2</sub> |
| <input type="checkbox"/> Agonal              | <input type="checkbox"/> Tracheostomy                 | By Whom: _____    | <input type="checkbox"/> Other _____             |
| <input checked="" type="checkbox"/> Assisted | <input type="checkbox"/> Other: _____                 |                   |                                                  |

### Circulation

1st Rhythm Requiring Compressions: Asystole

1st Pulseless Rhythm: \_\_\_\_\_

Time Chest Compressions Started: 2:15

Impedance Threshold Device used?  Yes  No

AED Applied:  Yes  No Time: \_\_\_\_\_

Pacemaker On:  Yes  No Time: \_\_\_\_\_

Defibrillator Type(s): \_\_\_\_\_

### Outcome

Time Resuscitation Event Ended: \_\_\_\_\_

Reason Resuscitation Ended:

Survived – Return of Circulation (ROC) >20 min

Died – Efforts Terminated (No Sustained ROC)

| Time        | Pulse       |          | HR              | Rhythm | BP | Breathing   |          | SpO <sub>2</sub> | CPR | Defibrillator Type<br>AED / Manual | Joules | Bolus Medications<br>(* if given by ET Tube) |          |                    |           |            |           | Infusions<br>Dose / cc per hr |            |             |                | Other Infusions / Volume replacement<br>or Blood products given | Comments                                      |
|-------------|-------------|----------|-----------------|--------|----|-------------|----------|------------------|-----|------------------------------------|--------|----------------------------------------------|----------|--------------------|-----------|------------|-----------|-------------------------------|------------|-------------|----------------|-----------------------------------------------------------------|-----------------------------------------------|
|             | Spontaneous | Assisted |                 |        |    | Spontaneous | Assisted |                  |     |                                    |        | Epinephrine                                  | Atropine | Sodium Bicarbonate | Adenosine | Amiodarone | Lidocaine | Dopamine                      | Dobutamine | Epinephrine | Norepinephrine |                                                                 |                                               |
| <u>2:15</u> |             | /        | <u>Asystole</u> |        |    |             |          |                  |     |                                    |        |                                              |          |                    |           |            |           |                               |            |             |                | <u>NS 500 mL bolus given</u>                                    |                                               |
| <u>2:17</u> |             | /        | "               |        |    |             |          |                  |     |                                    |        |                                              |          |                    |           |            |           |                               |            |             |                |                                                                 |                                               |
| <u>2:19</u> |             | /        | "               |        |    |             |          |                  |     |                                    |        |                                              |          |                    |           |            |           |                               |            |             |                |                                                                 |                                               |
| <u>2:20</u> |             | /        | "               |        |    |             |          |                  |     |                                    |        |                                              |          |                    |           |            |           |                               |            |             |                |                                                                 |                                               |
| <u>2:22</u> |             | /        | "               |        |    |             |          |                  |     |                                    |        |                                              |          |                    |           |            |           |                               |            |             |                |                                                                 | <u>D50 50mg given + NS 1L bolus initiated</u> |
| <u>2:23</u> |             | /        |                 |        |    |             |          |                  |     |                                    |        |                                              |          |                    |           |            |           |                               |            |             |                |                                                                 |                                               |
| <u>2:24</u> |             | /        | <u>PEA</u>      |        |    |             |          |                  |     |                                    |        |                                              |          |                    |           |            |           |                               |            |             |                |                                                                 |                                               |
| <u>2:25</u> |             | /        |                 |        |    |             |          |                  |     |                                    |        |                                              |          |                    |           |            |           |                               |            |             |                |                                                                 |                                               |
| <u>2:26</u> |             | /        | <u>PEA</u>      |        |    |             |          |                  |     |                                    |        |                                              |          |                    |           |            |           |                               |            |             |                |                                                                 |                                               |
| <u>2:28</u> |             | /        | "               |        |    |             |          |                  |     |                                    |        |                                              |          |                    |           |            |           |                               |            |             |                |                                                                 |                                               |
| <u>2:29</u> |             | /        |                 |        |    |             |          |                  |     |                                    |        |                                              |          |                    |           |            |           |                               |            |             |                |                                                                 |                                               |
| <u>2:30</u> |             | /        | <u>PEA</u>      |        |    |             |          |                  |     |                                    |        |                                              |          |                    |           |            |           |                               |            |             |                |                                                                 |                                               |
| <u>2:32</u> |             | /        | <u>PEA</u>      |        |    |             |          |                  |     |                                    |        |                                              |          |                    |           |            |           |                               |            |             |                |                                                                 |                                               |

## Cardiopulmonary Resuscitation Report

|                                                                                                                                                        |                              |                                                                                          |                                                                     |
|--------------------------------------------------------------------------------------------------------------------------------------------------------|------------------------------|------------------------------------------------------------------------------------------|---------------------------------------------------------------------|
| Date: _____                                                                                                                                            | Time Event Recognized: _____ | Location: _____                                                                          | Witnessed: <input type="checkbox"/> Yes <input type="checkbox"/> No |
| Code <input type="checkbox"/> Blue <input type="checkbox"/> Pink                                                                                       | Team Arrival Time: _____     | Weight (Kg): _____                                                                       | Height (cm): _____                                                  |
| Hospital-wide resuscitation response activated? <input type="checkbox"/> Yes <input type="checkbox"/> No                                               |                              | Was patient conscious at onset? <input type="checkbox"/> Yes <input type="checkbox"/> No |                                                                     |
| Condition when need for compressions/defibrillation was identified? <input type="checkbox"/> Pulseless <input type="checkbox"/> Pulse (poor perfusion) |                              |                                                                                          |                                                                     |
| Did the patient with a pulse requiring compressions become pulseless? <input type="checkbox"/> Yes <input type="checkbox"/> No                         |                              |                                                                                          |                                                                     |

### Airway/ Ventilation

| Breathing                            | Ventilation                                | Intubation     | Confirmation                          |
|--------------------------------------|--------------------------------------------|----------------|---------------------------------------|
| <input type="checkbox"/> Spontaneous | <input type="checkbox"/> Bag-Valve-Mask    | Time: _____    | <input type="checkbox"/> Auscultation |
| <input type="checkbox"/> Apneic      | <input type="checkbox"/> Endotracheal Tube | Size: _____    | <input type="checkbox"/> Exhaled CO2  |
| <input type="checkbox"/> Agonal      | <input type="checkbox"/> Tracheostomy      | By Whom: _____ | <input type="checkbox"/> Other _____  |
| <input type="checkbox"/> Assisted    | <input type="checkbox"/> Other: _____      |                |                                       |

### Circulation

1st Rhythm Requiring Compressions: \_\_\_\_\_  
 1st Pulseless Rhythm: \_\_\_\_\_  
 Time Chest Compressions Started: \_\_\_\_\_  
 Impedance Threshold Device used?  Yes  No  
 AED Applied:  Yes  No Time: \_\_\_\_\_  
 Pacemaker On:  Yes  No Time: \_\_\_\_\_  
 Defibrillator Type(s): \_\_\_\_\_

### Outcome

Time Resuscitation Event Ended: \_\_\_\_\_  
  
 Reason Resuscitation Ended:  
 Survived – Return of Circulation (ROC) >20 min  
 Died – Efforts Terminated (No Sustained ROC)

| Time | Pulse       |          | HR                     | Rhythm | BP | Breathing   |          | SpO2 | CPR | Defibrillator Type<br>AED / Manual | Joules | Bolus Medications<br>(* If given by ET Tube) |          |                    |           |            |           | Infusions<br>Dose / cc per hr | Other Infusions /Volume replacement<br>or Blood products given | Comments |                       |
|------|-------------|----------|------------------------|--------|----|-------------|----------|------|-----|------------------------------------|--------|----------------------------------------------|----------|--------------------|-----------|------------|-----------|-------------------------------|----------------------------------------------------------------|----------|-----------------------|
|      | Spontaneous | Assisted |                        |        |    | Spontaneous | Assisted |      |     |                                    |        | Epinephrine                                  | Atropine | Sodium Bicarbonate | Adenosine | Amiodarone | Lidocaine |                               |                                                                |          | Dopamine              |
| 8:33 |             | /        | PEA                    |        |    |             |          |      | /   |                                    |        |                                              |          |                    |           |            |           |                               |                                                                |          |                       |
| 8:34 |             | /        | FINE VF                |        |    |             |          |      | /   |                                    | 100    |                                              |          |                    |           |            |           |                               |                                                                |          |                       |
| 8:36 |             | /        | FINE VF                |        |    |             |          |      | /   |                                    | 200    |                                              |          |                    |           |            |           |                               |                                                                |          |                       |
| 8:38 |             | /        | PEA                    |        |    |             |          |      | /   |                                    |        |                                              |          |                    |           |            |           |                               |                                                                |          |                       |
| 8:39 |             | /        |                        |        |    |             |          |      | /   |                                    |        |                                              |          |                    |           |            |           |                               |                                                                |          |                       |
| 8:40 |             | /        | PEA                    |        |    |             |          |      | /   |                                    |        |                                              |          |                    |           |            |           |                               |                                                                |          |                       |
| 8:42 |             | /        | PEA<br>pulseless<br>VF |        |    |             |          |      | /   |                                    | 200    |                                              |          |                    |           |            |           |                               |                                                                |          |                       |
| 8:44 |             | /        | PEA                    |        |    |             |          |      | /   |                                    |        |                                              |          |                    |           |            |           |                               |                                                                |          |                       |
| 8:45 |             | /        |                        |        |    |             |          |      | /   |                                    |        |                                              |          |                    |           |            |           |                               |                                                                |          |                       |
| 8:46 |             | /        | PEA                    |        |    |             |          |      | /   |                                    |        |                                              |          |                    |           |            |           |                               |                                                                |          | 10g Sulfate 2g given  |
| 8:48 |             | /        | PEA                    |        |    |             |          |      | /   |                                    |        |                                              |          |                    |           |            |           |                               |                                                                |          | Atterplase 50mg given |
| 8:50 |             | /        | PEA                    |        |    |             |          |      | /   |                                    |        |                                              |          |                    |           |            |           |                               |                                                                |          |                       |
| 8:51 |             | /        |                        |        |    |             |          |      | /   |                                    |        |                                              |          |                    |           |            |           |                               |                                                                |          |                       |

## Cardiopulmonary Resuscitation Report

|                                                                                                                                                        |                        |                                                                                          |                                                                     |
|--------------------------------------------------------------------------------------------------------------------------------------------------------|------------------------|------------------------------------------------------------------------------------------|---------------------------------------------------------------------|
| Date:                                                                                                                                                  | Time Event Recognized: | Location:                                                                                | Witnessed: <input type="checkbox"/> Yes <input type="checkbox"/> No |
| Code: <input type="checkbox"/> Blue <input type="checkbox"/> Pink                                                                                      | Team Arrival Time:     | Weight (Kg):                                                                             | Height (cm):                                                        |
| Hospital-wide resuscitation response activated? <input type="checkbox"/> Yes <input type="checkbox"/> No                                               |                        | Was patient conscious at onset? <input type="checkbox"/> Yes <input type="checkbox"/> No |                                                                     |
| Condition when need for compressions/defibrillation was identified? <input type="checkbox"/> Pulseless <input type="checkbox"/> Pulse (poor perfusion) |                        |                                                                                          |                                                                     |
| Did the patient with a pulse requiring compressions become pulseless? <input type="checkbox"/> Yes <input type="checkbox"/> No                         |                        |                                                                                          |                                                                     |

| Airway/ Ventilation                                                                                                                                          |                                                                                                                                                                                        | Intubation                                   | Confirmation                                                                                                                       |
|--------------------------------------------------------------------------------------------------------------------------------------------------------------|----------------------------------------------------------------------------------------------------------------------------------------------------------------------------------------|----------------------------------------------|------------------------------------------------------------------------------------------------------------------------------------|
| Breathing<br><input type="checkbox"/> Spontaneous<br><input type="checkbox"/> Apneic<br><input type="checkbox"/> Agonal<br><input type="checkbox"/> Assisted | Ventilation<br><input type="checkbox"/> Bag-Valve-Mask<br><input type="checkbox"/> Endotracheal Tube<br><input type="checkbox"/> Tracheostomy<br><input type="checkbox"/> Other: _____ | Time: _____<br>Size: _____<br>By Whom: _____ | <input type="checkbox"/> Auscultation<br><input type="checkbox"/> Exhaled CO <sub>2</sub><br><input type="checkbox"/> Other: _____ |

**Circulation**

1st Rhythm Requiring Compressions: \_\_\_\_\_

1st Pulseless Rhythm: \_\_\_\_\_

Time Chest Compressions Started: \_\_\_\_\_

Impedance Threshold Device used?  Yes  No

AED Applied:  Yes  No Time: \_\_\_\_\_

Pacemaker On:  Yes  No Time: \_\_\_\_\_

Defibrillator Type(s): \_\_\_\_\_

**Outcome**

Time Resuscitation Event Ended: \_\_\_\_\_

Reason Resuscitation Ended:

Survived - Return of Circulation (ROC) >20 min

Died - Efforts Terminated (No Sustained ROC)

| Time | Pulse       |          | HR  | Rhythm | BP | Breathing   |          | SpO <sub>2</sub> | CPR | Defibrillator Type<br>AED / Manual | Joules | Bolus Medications<br>(* If given by ET Tube) |          |                       |           |            | Infusions<br>Dose / cc per hr |          |            |             | Other Infusions /Volume replacement<br>or Blood products given | Comments |                     |
|------|-------------|----------|-----|--------|----|-------------|----------|------------------|-----|------------------------------------|--------|----------------------------------------------|----------|-----------------------|-----------|------------|-------------------------------|----------|------------|-------------|----------------------------------------------------------------|----------|---------------------|
|      | Spontaneous | Assisted |     |        |    | Spontaneous | Assisted |                  |     |                                    |        | Epinephrine                                  | Atropine | Sodium<br>Bicarbonate | Adenosine | Amiodarone | Lidocaine                     | Dopamine | Dobutamine | Epinephrine |                                                                |          | Norepinephrine      |
|      |             |          |     |        |    |             |          |                  |     |                                    |        |                                              |          |                       |           |            |                               |          |            |             |                                                                |          |                     |
| 2:52 |             |          | PEA |        |    |             |          |                  | /   |                                    |        |                                              |          |                       |           |            |                               |          |            |             |                                                                |          |                     |
| 3:04 |             |          | PEA |        |    |             |          |                  | /   |                                    |        |                                              |          |                       |           |            |                               |          |            |             |                                                                |          |                     |
| 3:58 |             |          | PEA |        |    |             |          |                  | /   |                                    |        |                                              |          |                       |           |            |                               |          |            |             |                                                                |          | Calcium chloride 1g |
| 4:59 |             |          | PEA |        |    |             |          |                  | /   |                                    |        |                                              |          |                       |           |            |                               |          |            |             |                                                                |          |                     |
| 5:52 |             |          | PEA |        |    |             |          |                  | /   |                                    |        |                                              |          |                       |           |            |                               |          |            |             |                                                                |          |                     |
| 6:00 |             |          | PEA |        |    |             |          |                  | /   |                                    |        |                                              |          |                       |           |            |                               |          |            |             |                                                                |          |                     |
| 6:02 |             |          | PEA |        |    |             |          |                  | /   |                                    |        |                                              |          |                       |           |            |                               |          |            |             |                                                                |          |                     |
| 6:03 |             |          | PEA |        |    |             |          |                  | /   |                                    |        |                                              |          |                       |           |            |                               |          |            |             |                                                                |          |                     |
| 6:04 |             |          | PEA |        |    |             |          |                  | /   |                                    |        |                                              |          |                       |           |            |                               |          |            |             |                                                                |          |                     |
| 6:05 |             |          | PEA |        |    |             |          |                  | /   |                                    |        |                                              |          |                       |           |            |                               |          |            |             |                                                                |          |                     |
| 6:06 |             |          | PEA |        |    |             |          |                  | /   |                                    |        |                                              |          |                       |           |            |                               |          |            |             |                                                                |          |                     |
| 6:07 |             |          | PEA |        |    |             |          |                  | /   |                                    |        |                                              |          |                       |           |            |                               |          |            |             |                                                                |          |                     |
| 6:08 |             |          | PEA |        |    |             |          |                  | /   |                                    |        |                                              |          |                       |           |            |                               |          |            |             |                                                                |          | Mleplase 50mg given |

REV: June 2014

Legend

# Cardiopulmonary Resuscitation Report

last modified 15-01-2014

|                                                                                                                                                        |                       |                                                                                          |                                                                     |
|--------------------------------------------------------------------------------------------------------------------------------------------------------|-----------------------|------------------------------------------------------------------------------------------|---------------------------------------------------------------------|
| Date:                                                                                                                                                  | Time Event Recognized | Location:                                                                                | Witnessed: <input type="checkbox"/> Yes <input type="checkbox"/> No |
| Code <input type="checkbox"/> Blue <input type="checkbox"/> Pink                                                                                       | Team Arrival Time:    | Weight (Kg):                                                                             | Height (cm):                                                        |
| Hospital-wide resuscitation response activated? <input type="checkbox"/> Yes <input type="checkbox"/> No                                               |                       | Was patient conscious at onset? <input type="checkbox"/> Yes <input type="checkbox"/> No |                                                                     |
| Condition when need for compressions/defibrillation was identified? <input type="checkbox"/> Pulseless <input type="checkbox"/> Pulse (poor perfusion) |                       |                                                                                          |                                                                     |
| Did the patient with a pulse requiring compressions become pulseless? <input type="checkbox"/> Yes <input type="checkbox"/> No                         |                       |                                                                                          |                                                                     |

| Airway/ Ventilation                  |                                            | Intubation     | Confirmation                          |
|--------------------------------------|--------------------------------------------|----------------|---------------------------------------|
| Breathing                            | Ventilation                                | Time: _____    | <input type="checkbox"/> Auscultation |
| <input type="checkbox"/> Spontaneous | <input type="checkbox"/> Bag-Valve-Mask    | Size: _____    | <input type="checkbox"/> Exhaled CO2  |
| <input type="checkbox"/> Apneic      | <input type="checkbox"/> Endotracheal Tube | By Whom: _____ | <input type="checkbox"/> Other _____  |
| <input type="checkbox"/> Agonal      | <input type="checkbox"/> Tracheostomy      |                |                                       |
| <input type="checkbox"/> Assisted    | <input type="checkbox"/> Other: _____      |                |                                       |

**Circulation**

1st Rhythm Requiring Compressions: \_\_\_\_\_

1st Pulseless Rhythm: \_\_\_\_\_

Time Chest Compressions Started: \_\_\_\_\_

Impedance Threshold Device used?  Yes  No

AED Applied:  Yes  No Time: \_\_\_\_\_

Pacemaker On:  Yes  No Time: \_\_\_\_\_

Defibrillator Type(s): \_\_\_\_\_

**Outcome**

Time Resuscitation Event Ended: \_\_\_\_\_

Reason Resuscitation Ended:

Survived – Return of Circulation (ROC) >20 min

Died – Efforts Terminated (No Sustained ROC)

Defibrillator Type(s): \_\_\_\_\_

| Time | Pulse       |          | HR | Rhythm | BP | Breathing   |          | SpO2 | CPR | Defibrillator Type<br>AED / Manual | Joules | Bolus Medications<br>(* if given by ET Tube) |          |                    |           |            |           | Other Infusions /Volume replacement<br>or Blood products given | Comments |
|------|-------------|----------|----|--------|----|-------------|----------|------|-----|------------------------------------|--------|----------------------------------------------|----------|--------------------|-----------|------------|-----------|----------------------------------------------------------------|----------|
|      | Spontaneous | Assisted |    |        |    | Spontaneous | Assisted |      |     |                                    |        | Infusions<br>Dose / cc per hr                |          |                    |           |            |           |                                                                |          |
|      |             |          |    |        |    |             |          |      |     |                                    |        | Epinephrine                                  | Atropine | Sodium Bicarbonate | Adenosine | Amiodarone | Lidocaine |                                                                |          |
| 8:09 |             |          |    | PEA    |    |             |          |      | /   |                                    |        |                                              |          |                    |           |            |           |                                                                |          |
| 8:10 |             |          |    | PEA    |    |             |          |      | /   |                                    |        |                                              |          |                    |           |            |           |                                                                |          |
| 8:12 |             |          |    | PEA    |    |             |          |      | /   |                                    |        |                                              |          |                    |           |            |           |                                                                |          |
| 8:14 |             |          |    | PEA    |    |             |          |      | /   |                                    |        |                                              |          |                    |           |            |           |                                                                |          |
| 8:15 |             |          |    |        |    |             |          |      | /   |                                    |        |                                              |          |                    |           |            |           |                                                                |          |
| 8:16 |             |          |    | PEA    |    |             |          |      | /   |                                    |        |                                              |          |                    |           |            |           |                                                                |          |
| 8:18 |             |          |    | PEA    |    |             |          |      | /   |                                    |        |                                              |          |                    |           |            |           |                                                                |          |
| 8:20 |             |          |    | PEA    |    |             |          |      | /   |                                    |        |                                              |          |                    |           |            |           |                                                                |          |
| 8:21 |             |          |    |        |    |             |          |      | /   |                                    |        |                                              |          |                    |           |            |           |                                                                |          |
| 8:22 |             |          |    | PEA    |    |             |          |      | /   |                                    |        |                                              |          |                    |           |            |           |                                                                |          |
| 8:23 |             |          |    |        |    |             |          |      | /   |                                    |        |                                              |          |                    |           |            |           |                                                                |          |
| 8:24 |             |          |    | PEA    |    |             |          |      | /   |                                    |        |                                              |          |                    |           |            |           |                                                                |          |
| 8:26 |             |          |    | PEA    |    |             |          |      | /   |                                    |        |                                              |          |                    |           |            |           |                                                                |          |

rev June 2014

Legend

myocardia  
recuro  
via ET

## Cardiopulmonary Resuscitation Report

last modified 15-01-2014

|                                                                                                                                                        |  |                                                                                          |                    |                                                                     |
|--------------------------------------------------------------------------------------------------------------------------------------------------------|--|------------------------------------------------------------------------------------------|--------------------|---------------------------------------------------------------------|
| Date: _____                                                                                                                                            |  | Time Event Recognized: _____                                                             | Location: _____    | Witnessed: <input type="checkbox"/> Yes <input type="checkbox"/> No |
| Code <input type="checkbox"/> Blue <input type="checkbox"/> Pink                                                                                       |  | Team Arrival Time: _____                                                                 | Weight (Kg): _____ | Height (cm): _____                                                  |
| Hospital-wide resuscitation response activated? <input type="checkbox"/> Yes <input type="checkbox"/> No                                               |  | Was patient conscious at onset? <input type="checkbox"/> Yes <input type="checkbox"/> No |                    |                                                                     |
| Condition when need for compressions/defibrillation was identified? <input type="checkbox"/> Pulseless <input type="checkbox"/> Pulse (poor perfusion) |  |                                                                                          |                    |                                                                     |
| Did the patient with a pulse requiring compressions become pulseless? <input type="checkbox"/> Yes <input type="checkbox"/> No                         |  |                                                                                          |                    |                                                                     |

:33  
:29

### Airway/Ventilation

| Breathing                                                                                                                                       | Ventilation                                                                                                                                                             | Intubation                                   | Confirmation                                                                                                          |
|-------------------------------------------------------------------------------------------------------------------------------------------------|-------------------------------------------------------------------------------------------------------------------------------------------------------------------------|----------------------------------------------|-----------------------------------------------------------------------------------------------------------------------|
| <input type="checkbox"/> Spontaneous<br><input type="checkbox"/> Apneic<br><input type="checkbox"/> Agonal<br><input type="checkbox"/> Assisted | <input type="checkbox"/> Bag-Valve-Mask<br><input type="checkbox"/> Endotracheal Tube<br><input type="checkbox"/> Tracheostomy<br><input type="checkbox"/> Other: _____ | Time: _____<br>Size: _____<br>By Whom: _____ | <input type="checkbox"/> Auscultation<br><input type="checkbox"/> Exhaled CO3<br><input type="checkbox"/> Other _____ |

### Circulation

1st Rhythm Requiring Compressions: \_\_\_\_\_  
 1st Pulseless Rhythm: \_\_\_\_\_  
 Time Chest Compressions Started: \_\_\_\_\_  
 Impedance Threshold Device used?  Yes  No  
 AED Applied:  Yes  No Time: \_\_\_\_\_  
 Pacemaker On:  Yes  No Time: \_\_\_\_\_  
 Defibrillator Type(s): \_\_\_\_\_

### Outcome

Time Resuscitation Event Ended: \_\_\_\_\_  
 Reason Resuscitation Ended:  
 Survived – Return of Circulation (ROC) >20 min  
 Died – Efforts Terminated (No Sustained ROC)

| Time | Pulse       |          | HR | Rhythm | BP | Breathing   |          | SpO2 | CPR | Defibrillator Type<br>AED / Manual | Joules | Bolus Medications<br>(* if given by ET Tube) |          |                    |           |            |           | Infusions<br>Dose / cc per hr |            |             |                | Other Infusions /Volume replacement<br>or Blood products given | Comments                                                                                                      |
|------|-------------|----------|----|--------|----|-------------|----------|------|-----|------------------------------------|--------|----------------------------------------------|----------|--------------------|-----------|------------|-----------|-------------------------------|------------|-------------|----------------|----------------------------------------------------------------|---------------------------------------------------------------------------------------------------------------|
|      | Spontaneous | Assisted |    |        |    | Spontaneous | Assisted |      |     |                                    |        | Epinephrine                                  | Atropine | Sodium Bicarbonate | Adenosine | Amiodarone | Lidocaine | Dopamine                      | Dobutamine | Epinephrine | Norepinephrine |                                                                |                                                                                                               |
| 8:27 |             |          |    |        |    |             |          |      |     |                                    |        |                                              |          |                    |           |            |           |                               |            |             |                |                                                                |                                                                                                               |
| 8:28 |             |          |    |        |    |             |          |      |     |                                    |        |                                              |          |                    |           |            |           |                               |            |             |                |                                                                | Resuscitation stopped                                                                                         |
|      |             |          |    |        |    |             |          |      |     |                                    |        |                                              |          |                    |           |            |           |                               |            |             |                |                                                                | * ECHO done - w/ flutter but no cardiac contractions<br>ultrasound of the aortic done - no blood flow / pulse |

HOS 060023 HIXC Rev. June 2014

-Sinus Tachycardia  
P-Blood Pressure  
with \* if given via ET

## Cardiopulmonary Resuscitation Report

Date: 04-19 Location:                      Witnessed:  Yes  No  
 Code:  Blue  Pink Team Arrival Time: 04:19 Weight (Kg):              Height (cm):               
 Hospital-wide resuscitation response activated?  Yes  No Was patient conscious at onset?  Yes  No  
 Condition when need for compressions/defibrillation was identified?  Pulseless  Pulse (poor perfusion)  
 Did the patient with a pulse requiring compressions become pulseless?  Yes  No

**Airway/ Ventilation**

| Breathing                                    | Ventilation                                           | Intubation                   | Confirmation                                       |
|----------------------------------------------|-------------------------------------------------------|------------------------------|----------------------------------------------------|
| <input type="checkbox"/> Spontaneous         | <input type="checkbox"/> Bag-Valve-Mask               | Time: <u>            </u>    | <input type="checkbox"/> Auscultation              |
| <input type="checkbox"/> Apneic              | <input checked="" type="checkbox"/> Endotracheal Tube | Size: <u>            </u>    | <input type="checkbox"/> Exhaled CO2               |
| <input type="checkbox"/> Agonal              | <input type="checkbox"/> Tracheostomy                 | By Whom: <u>            </u> | <input type="checkbox"/> Other <u>            </u> |
| <input checked="" type="checkbox"/> Assisted | <input type="checkbox"/> Other: <u>            </u>   |                              |                                                    |

**Circulation**

1st Rhythm Requiring Compressions:                       
 1st Pulseless Rhythm:                       
 Time Chest Compressions Started:                       
 Impedance Threshold Device used?  Yes  No  
 AED Applied:  Yes  No Time:                       
 Pacemaker On:  Yes  No Time:                       
 Defibrillator Type(s):                     

Time Resuscitation Event Ended:                       
**Reason Resuscitation Ended:**  
 Survived – Return of Circulation (ROC) >20 min  
 Died – Efforts Terminated (No Sustained ROC)

| Time  | Pulse       |          | HR  | Rhythm | BP      | Breathing   |          | SpO2 | CPR | Defibrillator Type<br>AED / Manual | Joules | Bolus Medications<br>(* if given by ET Tube) |          |                    |           |            | Infusions<br>Dose / cc per hr |          |            |             | Other Infusions / Volume replacement<br>or Blood products given | Comments |                |                                           |  |
|-------|-------------|----------|-----|--------|---------|-------------|----------|------|-----|------------------------------------|--------|----------------------------------------------|----------|--------------------|-----------|------------|-------------------------------|----------|------------|-------------|-----------------------------------------------------------------|----------|----------------|-------------------------------------------|--|
|       | Spontaneous | Assisted |     |        |         | Spontaneous | Assisted |      |     |                                    |        | Epinephrine                                  | Atropine | Sodium Bicarbonate | Adenosine | Amiodarone | Lidocaine                     | Dopamine | Dobutamine | Epinephrine |                                                                 |          | Norepinephrine |                                           |  |
| 04:19 | ✓           |          | 112 | 55     | 108/190 |             | ✓        | 100% |     |                                    |        |                                              |          |                    |           |            |                               |          |            |             |                                                                 |          |                | ̄ pupil reactive to light                 |  |
| 04:24 | ✓           |          | 108 | 55     | 113/183 |             | -        | 100% |     |                                    |        |                                              |          |                    |           |            |                               |          |            |             |                                                                 |          |                | Morpinephrine 0.1mg started + NS 100ml/hr |  |
| 04:45 | ✓           |          | 118 | 55     | 124/208 |             | ✓        | 100% |     |                                    |        |                                              |          |                    |           |            |                               |          |            |             |                                                                 |          |                | Ƨentanyl 30mg given                       |  |
| 04:55 | ✓           |          | 113 | 55     | 164/204 |             | ✓        | 100% |     |                                    |        |                                              |          |                    |           |            |                               |          |            |             |                                                                 |          |                | Patient reached ROSC                      |  |
|       |             |          |     |        |         |             |          |      |     |                                    |        |                                              |          |                    |           |            |                               |          |            |             |                                                                 |          |                |                                           |  |
|       |             |          |     |        |         |             |          |      |     |                                    |        |                                              |          |                    |           |            |                               |          |            |             |                                                                 |          |                |                                           |  |
|       |             |          |     |        |         |             |          |      |     |                                    |        |                                              |          |                    |           |            |                               |          |            |             |                                                                 |          |                |                                           |  |
|       |             |          |     |        |         |             |          |      |     |                                    |        |                                              |          |                    |           |            |                               |          |            |             |                                                                 |          |                |                                           |  |
|       |             |          |     |        |         |             |          |      |     |                                    |        |                                              |          |                    |           |            |                               |          |            |             |                                                                 |          |                |                                           |  |
|       |             |          |     |        |         |             |          |      |     |                                    |        |                                              |          |                    |           |            |                               |          |            |             |                                                                 |          |                |                                           |  |
|       |             |          |     |        |         |             |          |      |     |                                    |        |                                              |          |                    |           |            |                               |          |            |             |                                                                 |          |                |                                           |  |
|       |             |          |     |        |         |             |          |      |     |                                    |        |                                              |          |                    |           |            |                               |          |            |             |                                                                 |          |                |                                           |  |
|       |             |          |     |        |         |             |          |      |     |                                    |        |                                              |          |                    |           |            |                               |          |            |             |                                                                 |          |                |                                           |  |
|       |             |          |     |        |         |             |          |      |     |                                    |        |                                              |          |                    |           |            |                               |          |            |             |                                                                 |          |                |                                           |  |
|       |             |          |     |        |         |             |          |      |     |                                    |        |                                              |          |                    |           |            |                               |          |            |             |                                                                 |          |                |                                           |  |
|       |             |          |     |        |         |             |          |      |     |                                    |        |                                              |          |                    |           |            |                               |          |            |             |                                                                 |          |                |                                           |  |
|       |             |          |     |        |         |             |          |      |     |                                    |        |                                              |          |                    |           |            |                               |          |            |             |                                                                 |          |                |                                           |  |

HOS 060023/HIMC-Rev. June 2014)

cardia  
sure  
ie ET
